# Supplementary material for: Self-regeneration of ferrites incorporated into matched matrices for thermochemical CO2 splitting
Source: Royal Society of Chemistry journal article supplement (doi:10.1039/c6ta00148c), 2016-01-01
Supplement: c6ta00148c1.pdf [file c6ta00148c1.pdf]

## Supporting information

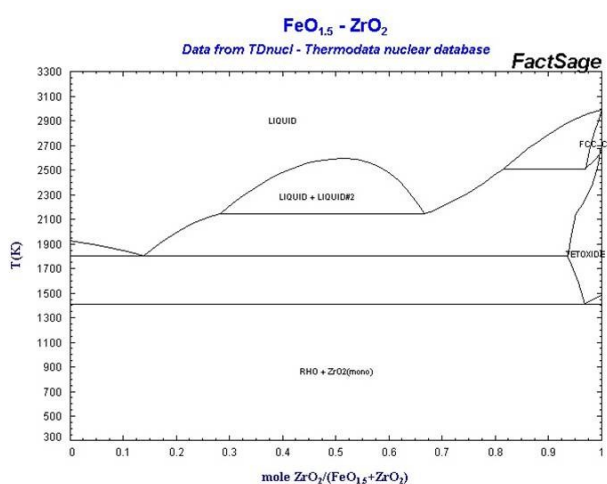

Fig S1. The phase diagram of  $\text{ZrO}_2$ - $\text{Fe}_2\text{O}_3$ .

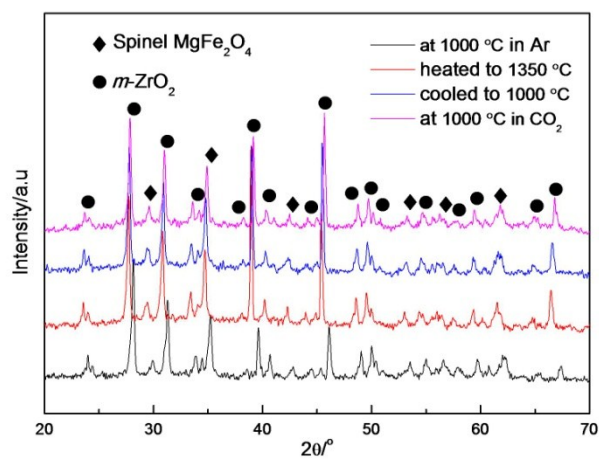

Fig S2. The in-situ high temperature XRD patterns of the 30 wt %  $\text{MgFe}_2\text{O}_4$  /  $\text{ZrO}_2$ .
